# Supplementary material for: Flow-cytometry Assessment of DNA content Analysis and Immunophenotyping of Immune-cells in Lymph-node-specimens as Potential Diagnostic Signature of Aggressiveness in B-Non-Hodgkin Lymphomas
Source: Preprints.org preprint supplement (doi:10.20944/preprints202311.0952.v2), 2024-01-03
Supplement: Supplementary file 4 [file supplementary]

Supplementary table 1: Classification and prevalence of the specimens with B-NHL

| **B-NHL Classification** | **N (% of total)** | **Clinical behavior** |
| --- | --- | --- |
| DLBCL | 30 (48.3%) | Aggressive |
| FL | 18 (29%) | Indolent |
| MZL | 8 (13%) | Indolent |
| MCL | 3 (5%) | Aggressive |
| ALC | 1 (1.6 %) | Aggressive |
| SLL | 2 (3.2 %) | Indolent |
| Total | 62 (100%) | Aggressive: Indolent N (%)  34 : 28 (55:45) |
